# Supplementary material for: Assessment of Public Hospitals’ Readiness to Manage Hypoxemia: A Cross-Sectional Study in Rwanda, 2022
Source: Research Square preprint supplement (doi:10.21203/rs.3.rs-7760712/v1), 2025-10-13
Supplement: Supplementary file 1 [file 05eda7ee481bbfd836f199b8.docx]

**Table S1: Available of functional pulse oximeters and oxygen equipment found in low-acuity wards and outpatient departments in hospitals Rwanda**

| **Wards** | **Number with pulse oximeter (%)** | **Number with oxygen production from on-site PSA plant (%)** | **Number with oxygen concentrators (%)** | **Number with oxygen cylinders (%)** | **Number with medical gas piping system (%)** | **Number with any oxygen source (%)** | **Number assessed** |
| --- | --- | --- | --- | --- | --- | --- | --- |
| **Outpatient Department (OPD)** | 13 (41.9) | - | 0 (0.0) | 0 (0.0) | 5 (16.1) | 5 (16.1) | 31 |
| **Mental health** | 2 (10.0) | - | 0 (0.0) | 0 (0.0) | 2 (10.0) | 2 (10) | 20 |
| **Stomatology** | 0 (0.0) | - | 0 (0.0) | 1 (7.7) | 0 (0.0) | 1 (7.7) | 13 |
| **Ear Nose and Throat (ENT)** | 1 (20.0) | - | 0 (0.0) | 2 (40.0) | 1 (20.0) | 2 (40) | 5 |
| **Infusion Center** | 0 (0.0) | - | 0 (0.0) | 0 (0.0) | 0 (0.0) | 0 (0) | 1 |
| **Radiography** | 0 (0.0) | - | 0 (0.0) | 0 (0.0) | 0 (0.0) | 0 (0) | 1 |
| **Physiotherapy** | 0 (0.0) | - | 0 (0.0) | 0 (0.0) | 0 (0.0) | 0 (0) | 1 |

***Table S2: Pulse oximeters and oxygen delivery points in 37 hospitals in Rwanda compared with optimal number based on bed size and acuity***

| **Facility ID** | **Total functional pulse oximeters** | **Optimal number of pulse oximeters for facility** | **Gap of functional pulse oximeters** | **Total oxygen delivery points** | **Optimal number of oxygen delivery points for facility** | **Gap of oxygen delivery points** |
| --- | --- | --- | --- | --- | --- | --- |
| **1** | 15 | 39 | 24 | 57 | 39 | 0 |
| **2** | 87 | 106 | 19 | 103 | 106 | 3 |
| **3** | 194 | 101 | 0 | 460 | 101 | 0 |
| **4** | 24 | 50 | 26 | 73 | 50 | 0 |
| **5** | 12 | 19 | 7 | 23 | 19 | 0 |
| **6** | 3 | 13 | 10 | 5 | 13 | 8 |
| **7** | 15 | 14 | 0 | 40 | 14 | 0 |
| **8** | 29 | 29 | 0 | 46 | 29 | 0 |
| **9** | 26 | 36 | 10 | 119 | 36 | 0 |
| **10** | 5 | 9 | 4 | 4 | 9 | 5 |
| **11** | 9 | 37 | 28 | 39 | 37 | 0 |
| **12** | 20 | 53 | 33 | 83 | 53 | 0 |
| **13** | 26 | 10 | 0 | 87 | 10 | 0 |
| **14** | 10 | 20 | 10 | 28 | 20 | 0 |
| **15** | 13 | 32 | 19 | 96 | 32 | 0 |
| **16** | 42 | 76 | 34 | 77 | 76 | 0 |
| **17** | 8 | 44 | 36 | 9 | 44 | 35 |
| **18** | 111 | 74 | 0 | 105 | 74 | 0 |
| **19** | 47 | 52 | 5 | 68 | 52 | 0 |
| **20** | 23 | 38 | 15 | 38 | 38 | 0 |
| **21** | 35 | 53 | 18 | 20 | 53 | 33 |
| **22** | 9 | 17 | 8 | 24 | 17 | 0 |
| **23** | 19 | 26 | 7 | 35 | 26 | 0 |
| **24** | 30 | 32 | 2 | 76 | 32 | 0 |
| **25** | 18 | 33 | 15 | 58 | 33 | 0 |
| **26** | 29 | 1 | 0 | 7 | 1 | 0 |
| **27** | 24 | 46 | 22 | 51 | 46 | 0 |
| **28** | 16 | 28 | 12 | 23 | 28 | 5 |
| **29** | 14 | 48 | 34 | 57 | 48 | 0 |
| **30** | 52 | 40 | 0 | 87 | 40 | 0 |
| **31** | 13 | 46 | 33 | 45 | 46 | 1 |
| **32** | 8 | 4 | 0 | 2 | 4 | 2 |
| **33** | 21 | 44 | 23 | 141 | 44 | 0 |
| **34** | 32 | 43 | 11 | 14 | 43 | 29 |
| **35** | 9 | 20 | 11 | 73 | 20 | 0 |
| **36** | 25 | 39 | 14 | 67 | 39 | 0 |
| **37** | 25 | 30 | 5 | 47 | 30 | 0 |

**Table S3: Pulse oximetry devices found at low-acuity wards in Rwandan hospitals relative to bed size and acuity**

| Ward name | 1 or more pulse oximeter to 1 bed | | 1 pulse oximeter to 2-5 beds | | 1 pulse oximeter to 6-10 beds | | 1 pulse oximeter to 11 or more beds | | No pulse oximeter | | Total number of wards meeting benchmark | |
| --- | --- | --- | --- | --- | --- | --- | --- | --- | --- | --- | --- | --- |
| n | % | n | % | n | % | n | % | n | % | n | % |
| Physiotherapy (n=1) | **0** | **0.0** | **0** | **0.0** | **0** | **0.0** | 0 | 0.0 | 1 | 100.0 | 0 | 0.0 |
| Ear Nose and Throat (n=2) | **1** | **50.0** | **1** | **50.0** | **0** | **0.0** | 0 | 0.0 | 0 | 0.0 | 2 | 100.0 |
| Stomatology (n=2) | **0** | **0.0** | **0** | **0.0** | **0** | **0.0** | 0 | 0.0 | 2 | 100.0 | 0 | 0.0 |
| Mental health (n=10) | **1** | **10** | **2** | **20.0** | **1** | **10** | 0 | 0 | 6 | 60 | 4 | 40.0 |

*Figures in bold indicate the ratio of pulse oximeters to beds meets the criteria for this type of ward acuity.

**Table S4: Oxygen delivery points found at low-acuity wards in Rwandan hospitals relative to bed size and acuity**

| Ward name | 1 or more oxygen delivery point to 1 bed | | 1 oxygen delivery point to 2-5 beds | | 1 oxygen delivery point to 6-10 beds | | 1 oxygen delivery point to 11 or more beds | | No oxygen delivery point | | Total number of wards meeting benchmark | |
| --- | --- | --- | --- | --- | --- | --- | --- | --- | --- | --- | --- | --- |
| n | % | n | % | n | % | n | % | n | % | n | % |
| Physiotherapy (n=1) | **0** | **0.0** | **0** | **0.0** | **0** | **0.0** | 0 | 0.0 | 1 | 100.0 | 0 | 0.0 |
| Ear Nose and Throat (n=2) | **0** | **0.0** | **1** | **50.0** | **0** | **0.0** | 0 | 0.0 | 1 | 50.0 | 1 | 50.0 |
| Stomatology (n=2) | **0** | **0.0** | **0** | **0.0** | **0** | **0.0** | 0 | 0.0 | 2 | 100.0 | 0 | 0.0 |
| Mental health (n=10) | **0** | **0** | **0** | **0** | **0** | **0** | 0 | 0 | 10 | 100 | 0 | 0.0 |

*Figures in bold indicate the ratio of oxygen delivery points to beds meets the criteria for this type of ward acuity.
