# Supplementary material for: Assessment of Public Hospitals’ Readiness to Manage Hypoxemia: A Cross-Sectional Study in Rwanda, 2022
Source: Research Square preprint supplement (doi:10.21203/rs.3.rs-7760712/v1), 2025-10-13
Supplement: Supplementary file 2 [file 53e8ae7f321ae15c56e29108.docx]

***Healthcare worker survey questionnaire***

| **TOOL SUMMARY** | |
| --- | --- |
| **Study name** | Rwanda Hypoxemia Management Study |
| **Tool name** | Assessment survey 1 |
| **Primary target respondent** | Healthcare worker |
| **GENERAL INFORMATION** | |
| District |  |
| Facility Type |  |
| Facility Name |  |
| Date |  |
| **TRAINEE IDENTIFICATION** | |
| What is your cadre/qualification (Job Category)? | ☐1 Doctor/Medical Officer (general) |
| ☐2 Paediatrician |
| ☐3 Obstetrician & gynecologist |
| ☐4 Surgeon |
| ☐5 Physician |
| ☐6 Clinical Officer |
| ☐7 Midwife |
| ☐7 Nurse |
| ☐7 Anesthetic officer |
| ☐8 Health information officer |
| ☐9 Other Job Category (specify): _____________________ |
| What department are you assigned to? Select only the most applicable one | ☐1 Emergency |
| ☐2 ICU |
| ☐3 Neonatology |
| ☐4 Pediatric |
| ☐5 Maternity |
| ☐6 Operating Theatre |
| ☐7 Minor Surgery |
| ☐8 Post-operation |
| ☐9 Internal Medicine |
| ☐10 Isolation |
| ☐-222 Other (specify)________________ |
| **PULSE OXIMETRY** | |
| How would you rate your experience performing pulse oximetry? | ☐0 Not applicable (no experience) |
| ☐1 Fundamental awareness (basic knowledge) |
| ☐2 Novice (limited experience) |
| ☐3 Intermediate (practical application) |
| ☐4 Advanced (applied theory) |
| ☐5 Expert (recognized authority) |
| **OXYGEN THERAPY** | |
| How would you rate your experience administering oxygen therapy? | ☐0 Not applicable (no experience) |
| ☐1 Fundamental awareness (basic knowledge) |
| ☐2 Novice (limited experience) |
| ☐3 Intermediate (practical application) |
| ☐4 Advanced (applied theory) |
| ☐5 Expert (recognized authority) |
